# Supplementary material for: Improving Peach Fruit Quality Traits Using Deficit Irrigation Strategies in Southern Tunisia Arid Area
Source: MDPI journal article supplement (doi:10.3390/plants11131656), 2022-06-23
Supplement: s1 [file plants-1730125-supplementary.pdf › plants-1730125-supplementary.pdf]

Table S1. Single crop coefficients Kc for peach tree.

| K <sub>c</sub> ini | K <sub>c</sub> mid | K <sub>c</sub> end |
|--------------------|--------------------|--------------------|
| 0.55               | 0.90               | 0.65               |

Table S2. Effects of deficit irrigation DI and PRD<sub>50</sub> on the skin color of peach fruit under different irrigation treatments (FI, DI and PRD<sub>50</sub>). Different letters refer to significant differences tested by Duncan's multiple range test (P<0.05).

| Irrigation Treatments | L*          | a*          | b*           | CI           |
|-----------------------|-------------|-------------|--------------|--------------|
| FI                    | 52.45±1.11a | 23.01±7.01a | 33.17± 2.35a | 13.22± 4.30a |
| DI                    | 52.47±1.77a | 23.41±4.41a | 30.71±10.45a | 14.52±18.63a |
| PRD <sub>50</sub>     | 51.62±4.39a | 22.64±6.87a | 33.64±5.72a  | 13.05± 5.37a |

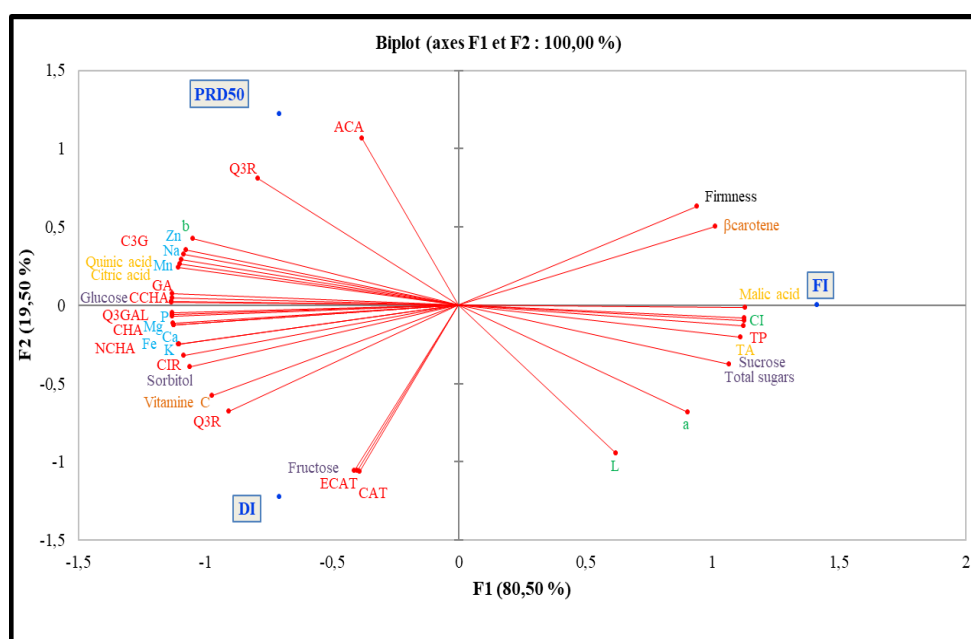

Figure S1. Principal component analysis for the quality traits evaluated on the Flordastar peach irrigated with three irrigation strategies (FI, DI and PRD<sub>50</sub>). Analysis was performed using mean data of the 2016 growing season.
